# Supplementary material for: HMGB1 and Its Hyperacetylated Isoform are Sensitive and Specific Serum Biomarkers to Detect Asbestos Exposure and to Identify Mesothelioma Patients
Source: Oxford University Press journal article supplement (doi:10.1158/1078-0432.ccr-15-1130), 2016-01-05
Supplement: 10780432ccr151130-sup-149698_2_supp_3260721_nzgdn0.docx [file 10780432ccr151130-sup-149698_2_supp_3260721_nzgdn0.docx]

**Table S1. Full demographic characterization of individuals involved in the study.**

| **ID** | **Age** | **Sex** | **Smoking** | **Professional Asbestos Exposure** | **Cancer** | **Stage** | **Pleural Effusions** | **Total HMGB1 (ng/mL)** | **Hyper-acetylated HMGB1 (ng/mL)** | **Fibulin-3 (ng/mL)** | **OPN (ng/mL)** | **MRP (ng/mL)** |
| --- | --- | --- | --- | --- | --- | --- | --- | --- | --- | --- | --- | --- |
| H1 | 38 | M | NO | NO | NO |  | NO | 1.1 | 0.5 |  |  |  |
| H2 | 42 | F | NO | NO | NO |  | NO | 2.6 | 0.6 |  |  |  |
| H3 | 21 | M | NO | NO | NO |  | NO | 1.9 | 0.3 |  |  |  |
| H4 | 36 | F | NO | NO | NO |  | NO | 0.8 | 0.7 |  |  |  |
| H5 | 44 | M | NO | NO | NO |  | NO | 2.3 | 0.8 |  |  |  |
| H6 | 26 | M | NO | NO | NO |  | NO | 0.87 | 0.4 |  |  |  |
| H7 | 56 | F | NO | NO | NO |  | NO | 0.81 | 0.1 |  |  |  |
| H8 | 27 | M | NO | NO | NO |  | NO | 1.78 | 0.1 |  |  |  |
| H9 | 37 | M | NO | NO | NO |  | NO | 0.32 | 0.2 |  |  |  |
| H10 | 41 | M | NO | NO | NO |  | NO | 2.01 | 0.5 |  |  |  |
| H11 | 49 | M | NO | NO | NO |  | NO | 2.29 | 0.9 |  |  |  |
| H12 | 41 | M | NO | NO | NO |  | NO | 0.62 | 0.7 |  |  |  |
| H13 | 25 | F | NO | NO | NO |  | NO | 1.41 | 0.6 |  |  |  |
| H14 | 64 | F | NO | NO | NO |  | NO | 1.32 | 0.4 |  |  |  |
| H15 | 29 | F | NO | NO | NO |  | NO | 1.76 | 0.3 |  |  |  |
| H16 | 47 | M | NO | NO | NO |  | NO | 1.32 | 0.2 |  |  |  |
| H17 | 23 | F | NO | NO | NO |  | NO | 1.98 | 0.6 |  |  |  |
| H18 | 49 | M | NO | NO | NO |  | NO | 1.23 | 0.3 |  |  |  |
| H19 | 41 | M | NO | NO | NO |  | NO | 2.36 | 0.5 |  |  |  |
| H20 | 33 | F | NO | NO | NO |  | NO | 1.41 | 0.7 |  |  |  |
| Asb1 | 42 | M | YES | < 20 years | NO |  | NO | 11.1 | 0.4 | 21.4756 | 34.96 | 12.50882 |
| Asb2 | 56 | M | YES | ≥ 20 years | NO |  | NO | 15.7 | 0.2 | 13.2877 | 21.399725 | 23.8244 |
| Asb3 | 49 | M | NO | < 20 years | NO |  | NO | 4.9 | 0.3 | 40.1556 | 53.95 | 16.31582 |
| Asb4 | 65 | M | YES | ≥ 20 years | NO |  | NO | 13.8 | 0.4 | 51.8484 | 17.590575 | 18.53108 |
| Asb5 | 47 | M | NO | ≥ 20 years | NO |  | NO | 11.4 | 0.6 | 22.8123 | 17.49605 | 19.13404 |
| Asb6 | 56 | M | YES | ≥ 20 years | NO |  | NO | 6.4 | 0.1 | 18.5905 | 37.324 | 17.02064 |
| Asb7 | 62 | M | YES | ≥ 20 years | NO |  | NO | 3.5 | 0.8 | 14.6779 | 35.54375 | 9.52488 |
| Asb8 | 52 | M | NO | ≥ 20 years | NO |  | NO | 9.9 | 0.1 | 21.123 | 8.80555 | 11.65856 |
| Asb9 | 44 | M | YES | ≥ 20 years | NO |  | NO | 12.5 | 0.1 | 16.8203 | 44.3125 | 30.5134 |
| Asb10 | 56 | M | NO | ≥ 20 years | NO |  | NO | 5.6 | 0.3 | 17.8959 | 29.4095 | 29.0932 |
| Asb11 | 58 | M | NO | ≥ 20 years | NO |  | NO | 10.4 | 0.3 | 25.5682 | 56.24175 | 16.6412 |
| Asb12 | 55 | M | YES | ≥ 20 years | NO |  | NO | 11.7 | 1.9 | 15.004 | 12.753925 | 15.82444 |
| Asb13 | 53 | M | YES | < 20 years | NO |  | NO | 14.2 | 0.6 | 56.3542 | 27.009 | 13.547 |
| Asb14 | 70 | M | YES | ≥ 20 years | NO |  | NO | 8.3 | 0.4 | 5.25956 | 3.9168 | 19.66094 |
| Asb15 | 56 | M | YES | ≥ 20 years | NO |  | NO | 10.5 | 0.2 | 2.8734 | 36.77525 | 16.3464 |
| Asb16 | 63 | M | YES | ≥ 20 years | NO |  | NO | 13.6 | 1.2 | 18.9485 | 2.669475 | 10.44004 |
| Asb17 | 55 | M | NO | < 20 years | NO |  | NO | 3.8 | 0.3 | 6.12838 | 35.12675 | 9.04916 |
| Asb18 | 65 | M | NO | ≥ 20 years | NO |  | NO | 1.1 | 0.7 | 7.69722 | 10.9303 | 21.813 |
| Asb19 | 42 | M | YES | < 20 years | NO |  | NO | 6.4 | 0.3 | 3.31255 | 28.37825 | 17.5944 |
| Asb20 | 70 | M | YES | ≥ 20 years | NO |  | NO | 5.7 | 0.4 | 3.00255 | 46.46775 | 9.05864 |
| MM1 | 61 | F | NO | < 20 years | MM | 3 | YES | 59.9 | 39.8 | 46.2541 | 54.55 | 44.1934 |
| MM2 | 66 | F | NO | < 20 years | MM | 3 | YES | 16.4 | 12.4 | 88.1786 | 76.4015 | 58.9668 |
| MM3 | 50 | F | YES | NO | MM | 4 | YES | 23.2 | 16.3 | 151.144 | 70.12875 | 108.1566 |
| MM4 | 58 | F | YES | < 20 years | MM | 3 | YES | 16.6 | 10.7 | 111.936 | 77.84725 | 141.83 |
| MM5 | 76 | M | YES | < 20 years | MM | 2 | YES | 36.1 | 21.9 | 49.8787 | 119.8525 | 45.6438 |
| MM6 | 71 | M | YES | < 20 years | MM | 3 | YES | 63.4 | 40.2 | 36.7745 | 409.495 | 192.2712 |
| MM7 | 73 | F | YES | < 20 years | MM | 2 | YES | 26.1 | 17.4 | 41.5634 | 56.46175 | 29.5894 |
| MM8 | 80 | M | NO | < 20 years | MM | 3 | YES | 11.4 | 6.1 | 83.8305 | 155.24525 | 22.6902 |
| MM9 | 81 | M | YES | < 20 years | MM | 2 | YES | 45.7 | 27.9 | 37.3635 | 150.93375 | 34.05 |
| MM10 | 73 | M |  | ≥ 20 years | MM | 3 | YES | 7.8 | 5.9 | 56.2035 | 75.0035 | 92.116 |
| MM11 | 64 | M | YES | < 20 years | MM | 3 | YES | 36.6 | 20.7 | 128.071 | 139.99275 | 220.984 |
| MM12 | 55 | M | NO | < 20 years | MM | 2 | YES | 44.1 | 26.8 | 38.8566 | 44.186 | 17.80812 |
| MM13 | 59 | M | YES | ≥ 20 years | MM | 1 | YES | 36.3 | 20.9 | 87.6252 | 33.795 | 25.8422 |
| MM14 | 25 | F | NO | NO | MM | 3 | YES | 23.9 | 17.3 | 200.554 | 84.887 | 59.3842 |
| MM15 | 89 | M | NO | ≥ 20 years | MM | 1 | YES | 3.6 | 2.4 | 60.8523 | 95.50625 | 30.8464 |
| MM16 | 77 | M | YES | ≥ 20 years | MM | 2 | YES | 27.3 | 19.7 | 119.358 | 172.11375 | 27.619 |
| MM17 | 75 | M | YES | ≥ 20 years | MM | 1 | YES | 27.8 | 18.7 | 101.575 | 60.24375 | 42.1062 |
| MM18 | 59 | M | YES | < 20 years | MM | 2 | YES | 15.8 | 10.3 | 45.0645 | 45.1065 | 66.6734 |
| MM19 | 74 | M | YES | < 20 years | MM | 3 | YES | 55.6 | 30.4 | 59.2125 | 106.44025 | 43.5086 |
| MM20 | 56 | M | NO |  | MM | 3 | YES | 15.7 | 13.3 | 240.10325 | 240.10325 | 106.305 |
| MM21 | 65 | F | NO |  | MM | 3 | YES | 3.4 | 3.2 | 145.10725 | 145.10725 | 174.222 |
| MM22 | 65 | M | YES |  | MM | 4 | YES | 2.6 | 2.1 | 164.38425 | 164.38425 | 12.8443 |
| Ben1 | M | 67 | YES |  | NO |  | YES | 6.5 | 5.2 | 63.3642 | 97.84775 | 16.4524 |
| Ben2 | F | 78 |  |  | NO |  | YES | 10.4 | 8.1 | 39.4971 | 255.8175 | 102.003 |
| Mal1 | F | 82 | YES |  | LYMPHOMA |  | YES | 12.6 | 11.3 | 41.9381 | 56.72775 | 34.028 |
| Mal2 | M | 86 | NO |  | LYMPHOMA |  | YES | 6.9 | 5.9 | 9.08033 | 99.64375 | 30.1432 |
| Mal3 | M | 18 | NO |  | NSCLC |  | YES | 1.5 | 1.1 | 0.2 | 69.33175 | 8.47577 |
| Ben3 | F | 43 | NO |  | NO |  | YES | 12.8 | 10.6 | 22.2148 | 75.675 | 10.4681 |
| Ben4 | M | 74 | YES |  | NO |  | YES | 10.6 | 8.9 | 21.2225 | 74.47075 | 21.3811 |
| Mal4 | M | 65 | NO |  | NSCLC |  | YES | 3.4 | 2.9 | 8.67527 | 121.3458 | 38.209 |
| Ben5 | F | 47 | NO |  | NO |  | YES | 4.8 | 3.9 | 30.4874 | 105.444 | 28.4325 |
| Ben6 | M | 84 | YES |  | NO |  | YES | 8.9 | 7.5 | 23.8493 | 56.364 | 35.5268 |
| Ben7 | M | 66 | YES |  | NO |  | YES | 6.4 | 5.1 | 39.0355 | 137.0808 | 25.9947 |
| Ben8 | M | 63 | YES |  | NO |  | YES | 3.3 | 2.6 | 40.6437 | 65.47375 | 21.3165 |
| Ben9 | M | 67 | YES |  | NO |  | YES | 5.5 | 4.1 | 18.6413 | 57.0265 | 23.9214 |
| Ben10 | F | 73 | YES |  | NO |  | YES | 6.4 | 5.7 | 2.4003 | 63.373 | 20.7841 |
| Mal5 | M | 65 | YES |  | NSCLC |  | YES | 17.8 | 15.7 | 15.1932 | 148.5098 | 22.1066 |
| Ben11 | F | 93 | NO |  | NO |  | YES | 8.7 | 6.9 | 53.3543 | 51.13475 | 20.9697 |
| Ben12 | F | 60 | YES |  | NO |  | YES | 4.5 | 3.4 | 26.2048 | 126.5385 | 18.7316 |
| Ben13 | M | 59 | NO |  | NO |  | YES | 3.4 | 2.9 | 19.0393 | 96.8095 | 49.0096 |
| Mal6 | F | 68 |  |  | BREAST |  | YES | 6.6 | 5.7 | 9.27292 | 81.02375 | 27.3833 |
| Mal7 | F | 40 | NO |  | BREAST |  | YES | 1.4 | 1.3 | 63.2857 | 431.475 | 215.512 |
| Mal8 | F | 45 |  |  | CHOLANGIO |  | YES | 7.7 | 5.9 | 64.4723 | 433.8425 | 23.0554 |
| Mal9 | M | 75 | NO |  | MELANOMA |  | YES | 5.1 | 4.2 | 23.0104 | 195.906 | 78.7056 |
| Mal10 | M | 62 | NO |  | NSCLC |  | YES | 10.2 | 9.1 | 32.9417 | 137.4518 | 26.3117 |
| Mal11 | M | 66 | YES |  | SCLC |  | YES | 12.4 | 11.6 | 56.1929 | 229.431 | 41.0153 |
| Mal12 | F | 77 | YES |  | NSCLC |  | YES | 5.1 | 4.8 | 25.2506 | 214.0833 | 31.3136 |
| Mal13 | F | 85 | NO |  | SARCOMA |  | YES | 6.7 | 5.4 | 22.7689 | 51.42775 | 26.1407 |
| Mal14 | M | 86 | NO |  | LYMPHOMA |  | YES | 2.3 | 1.9 | 11.4095 | 78.43475 | 25.5605 |
| Mal15 | F | 78 | YES |  | NSCLC |  | YES | 3.8 | 2.5 | 18.5142 | 66.14925 | 16.9944 |
| Mal16 | F | 79 | NO |  | NSCLC |  | YES | 9.8 | 7.9 | 0.2 | 59.29125 | 4.389 |
| Mal17 | M | 56 | NO |  | NSCLC |  | YES | 4.5 | 3.7 | 14.6286 | 31.606 | 22.6945 |
| Mal18 | M | 67 | YES |  | NSCLC |  | YES | 7.5 | 6.4 | 2.20185 | 82.04775 | 8.40764 |
| Mal19 | M | 49 | NO |  | SFTP |  | YES | 6.7 | 5.4 | 0.29129 | 53.919 | 32.2524 |
| Mal20 | F | 87 | NO |  | LYMPHOMA |  | YES | 8.7 | 6.4 | 15.7883 | 88.08575 | 10.9371 |
| Mal21 | M | 50 |  |  | SARCOMA |  | YES | 11.3 | 9.1 | 1.44303 | 129.4805 | 19.6771 |
| Mal22 | F | 61 | NO |  | UNKNOWN |  | YES | 2.3 | 1.7 | 2.464 | 183.872 | 15.0376 |
| Mal23 | F | 63 | NO |  | BREAST |  | YES | 10.6 | 8.5 | 0.2 | 32.558 | 4.20473 |
| Mal24 | F | 67 | NO |  | PANCREAS |  | YES | 6.7 | 5.7 | 39.7719 | 155.856 | 27.5158 |
| Mal25 | M | 78 | YES |  | EMCa |  | YES | 5.9 | 4.7 | 0.2 | 93.71525 | 3.41595 |

**Abbreviations**

H: healthy individuals

Asb: asbestos-exposed individuals

MM: malignant mesothelioma patients

Ben: patients with benign pleural effusions

Mal: patients with malign non-MM pleural effusions

NSCLC: non small cell lung carcinoma

SCLC: small cell lung carcinoma

SFTP: solitary fibrous tumor of the pleura

EMCa: epithelial-myoepithelial carcinoma
