# Supplementary material for: HMGB1 and Its Hyperacetylated Isoform are Sensitive and Specific Serum Biomarkers to Detect Asbestos Exposure and to Identify Mesothelioma Patients
Source: Oxford University Press journal article supplement (doi:10.1158/1078-0432.ccr-15-1130), 2016-01-05
Supplement: 10780432ccr151130-sup-149698_2_supp_3260723_nzgdn0.docx [file 10780432ccr151130-sup-149698_2_supp_3260723_nzgdn0.docx]

|  | **Fibulin-3, ng/ml**  **(median,**  **1st quartile-3rd quartile)** | **OPN, ng/ml**  **(median,**  **1st quartile-3rd quartile)** | **Mesothelin, ng/ml**  **(median,**  **1st quartile-3rd quartile)** |
| --- | --- | --- | --- |
| **Asbestos-exposed** | 17.36, 6.91-22.14 | 28.89, 15.12-37.05 | 16.49, 12.08-19.40 |
| **MM** | 85.73, 46.25-128.07 | 90.20, 60.24-150.93 | 44.92, 29.59-106.31 |
| **Benign Pleural Effusion** | 26.20, 20.13-40.07 | 75.68, 60.20-115.99 | 21.38, 19.76-31.98 |
| **Malignant (non-MM) Pleural Effusion** | 14.63, 1.82-29.10 | 93.71, 62.72-169.86 | 25.56, 12.99-31.78 |

**Table S3. Levels of other biomarkers in studied cohorts.**
